# Supplementary material for: Protein kinase CK2 contributes to the organization of sodium channels in axonal membranes by regulating their interactions with ankyrin G
Source: PubMed Central journal article supplement — J Cell Biol. 2008 Dec 15;183(6):1101–14. doi: 10.1083/jcb.200805169 (PMC2600743; doi:10.1083/jcb.200805169), 2008-12-15
Supplement: jcb.200805169_1.pdf [file jcb.200805169_1.pdf]

Brechet et al., <http://www.jcb.org/cgi/content/full/jcb.200805169/DC1>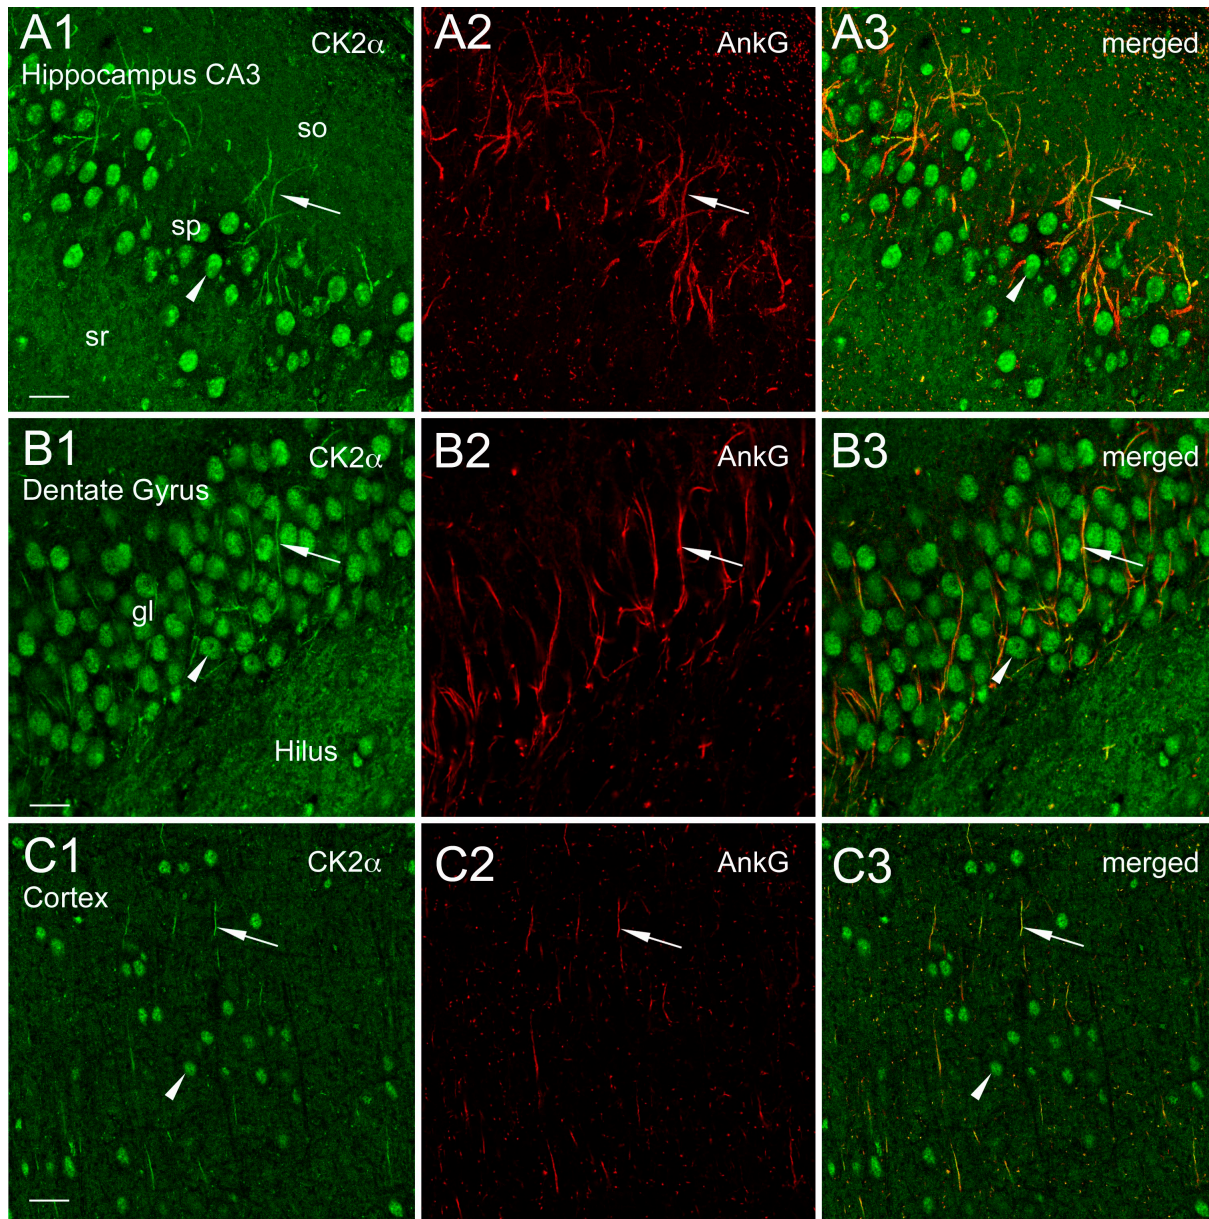

Figure S1. **CK2 $\alpha$  is concentrated at axonal initial segments in different rat brain regions.** (A and B) Confocal views showing CK2 $\alpha$  immunoreactivity within initial segments (arrows) and nuclei (arrowhead) of neurons in the CA3 area of hippocampus (A1–A3), dentate gyrus (B1–B3), and cortex (layers 4–6, C1–C3). Note that diffuse and light CK2 $\alpha$  labeling is visible throughout the neuropil. gl, granular layer; so, stratum; sp, stratum pyramidale; sr, stratum radiatum. Bars: (A) 10  $\mu$ m; (B) 26.8  $\mu$ m; (C) 11.37  $\mu$ m.
